# Supplementary material for: Self-organized structural hierarchy in mixed polysaccharide sponges
Source: Royal Society of Chemistry journal article supplement (doi:10.1039/b907916e), 2009-01-01
Supplement: b907916e.pdf [file b907916e.pdf]

Farid Khan, Dominic Walsh, Avinash J. Patil, Adam W. Perriman and Stephen Mann\*

Supporting Information

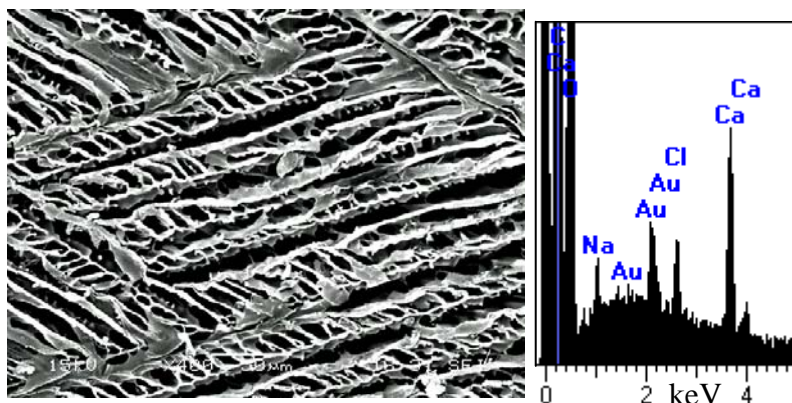

**Figure S1.** (a) SEM image of Ca-crosslinked alginate/dextran anisotropic sponge with encapsulated gold nanoparticles. (b) EDX analysis confirming presence of gold nanoparticles in the Ca-crosslinked microstructure.

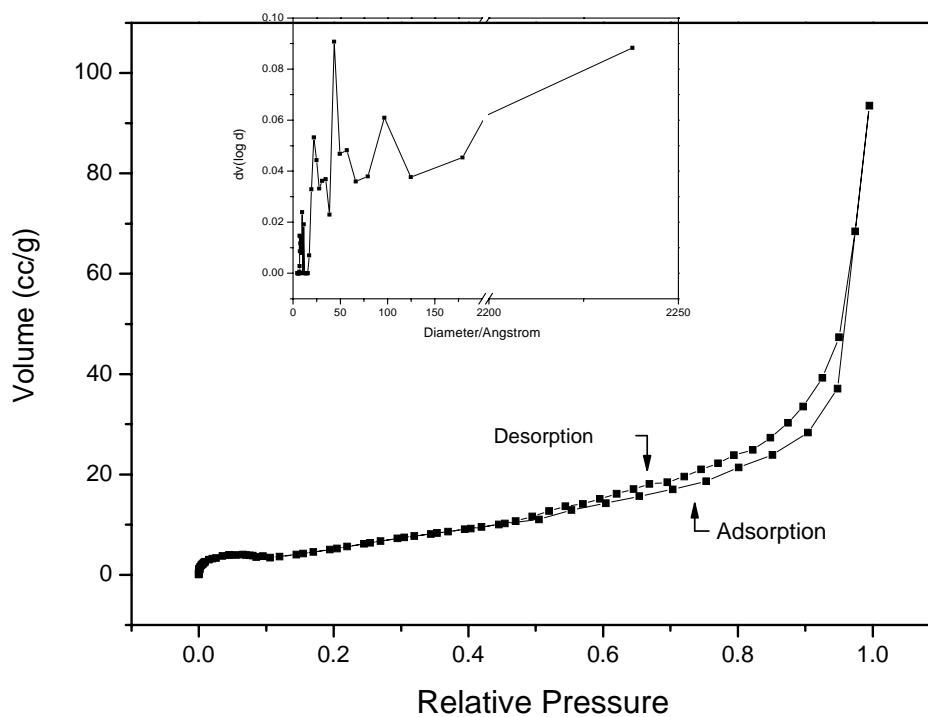

**Figure S2** BET surface area analysis of a calcium crosslinked alginate/dextran sponge containing encapsulated Au nanoparticles after treatment with methyl formate.
